# Supplementary material
Source: Springer Nature journal article supplement (https://www.springermedizin.de/resource/supplementary/12958_2012_1056_MOESM3_ESM.pdf/9566654)

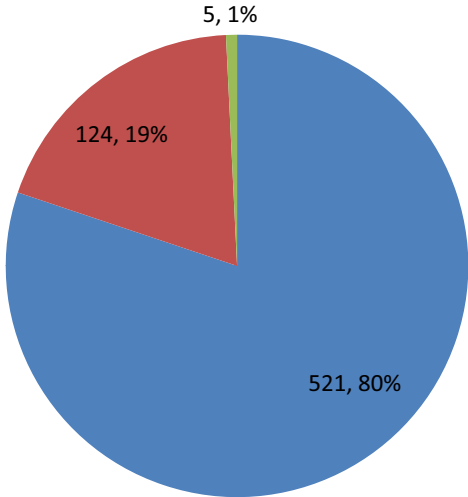

■ Satisfied

■ Neither satisfied  
nor dissatisfied

■ Not satisfied

Supplement: MOESM3 [file 9566654]
